# Supplementary material for: Nicotiana benthamiana Class 1 Reversibly Glycosylated Polypeptides Suppress Tobacco Mosaic Virus Infection
Source: MDPI journal article supplement (doi:10.3390/ijms241612843), 2023-08-16
Supplement: s1 [file s1]

# Supplementary material

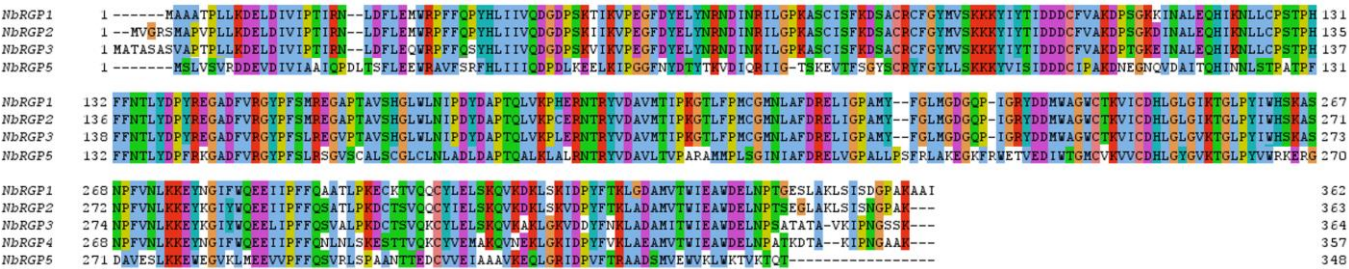

Amino Acid Sequence Identities of NbRGP Proteins

|        | NbRGP1 | NbRGP2 | NbRGP3 | NbRGP5 |
|--------|--------|--------|--------|--------|
| NbRGP1 | -      | 94.72% | 87.43% | 48.80% |
| NbRGP2 | 94.72% | -      | 92.46% | 48.87% |
| NbRGP3 | 87.43% | 92.46% | -      | 50.30% |
| NbRGP5 | 48.80% | 48.87% | 50.30% | -      |

**Figure S1.** Multiple alignment of NbRGP amino acid sequences (top) and the percent of similarity (bottom).

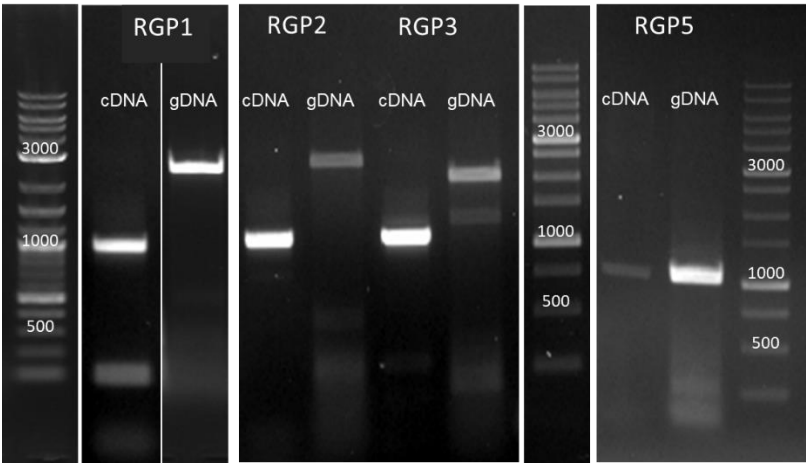

**Figure S2.** Comparison of PCR products obtained from cDNA and genomic DNA (gDNA) for each NbRGP.

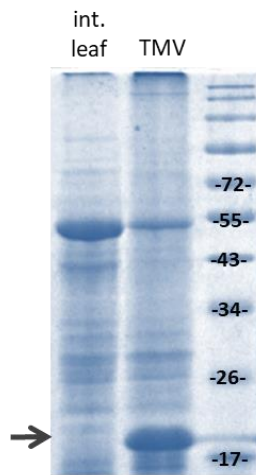

**Figure S3. TMV systemic infection.** Total soluble protein extracted from the intact leaf (int. leaf) and leaf with systemic TMV infection separated in PAAG and stained with Coomassie blue. The arrowhead indicates the band corresponding to TMV coat protein.

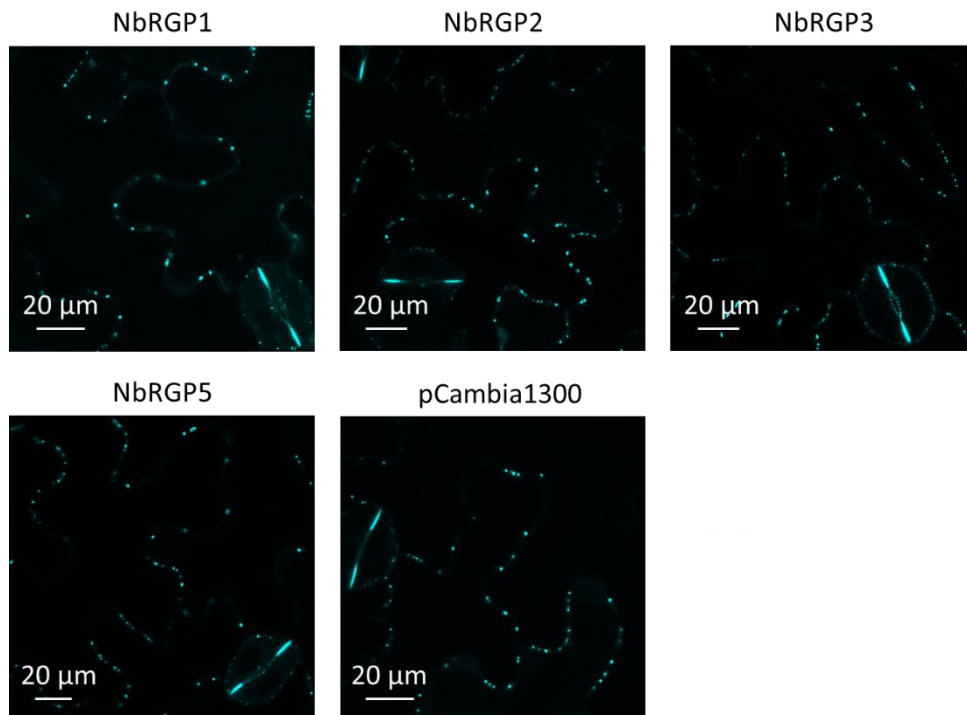

**Figure S4.** Confocal images of epidermal cells with *NbRGPs* overexpression after callose staining with aniline blue.

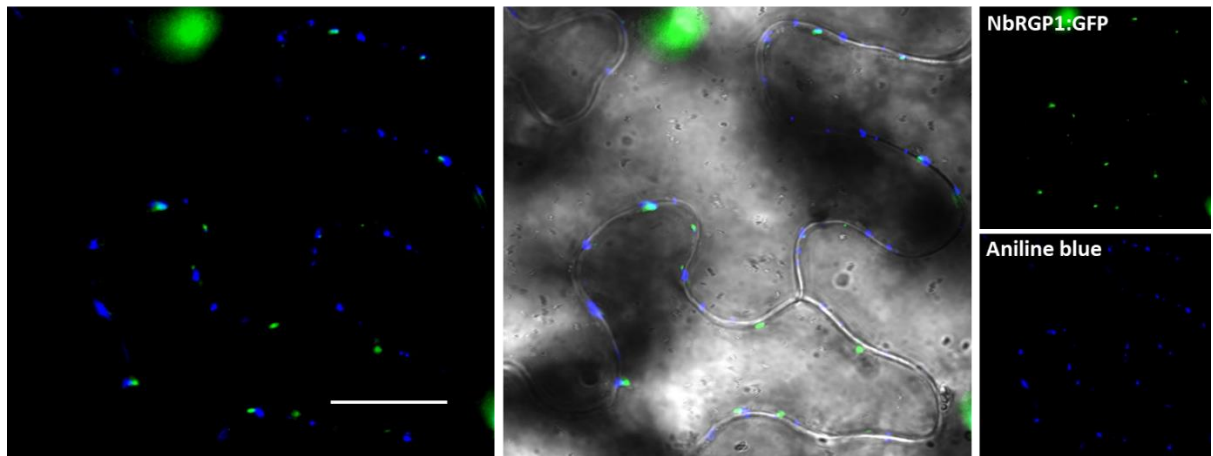

**Figure S5.** Confocal images of epidermal cells expressing 35S-NbRGP1:GFP (green) and stained with aniline blue (blue).

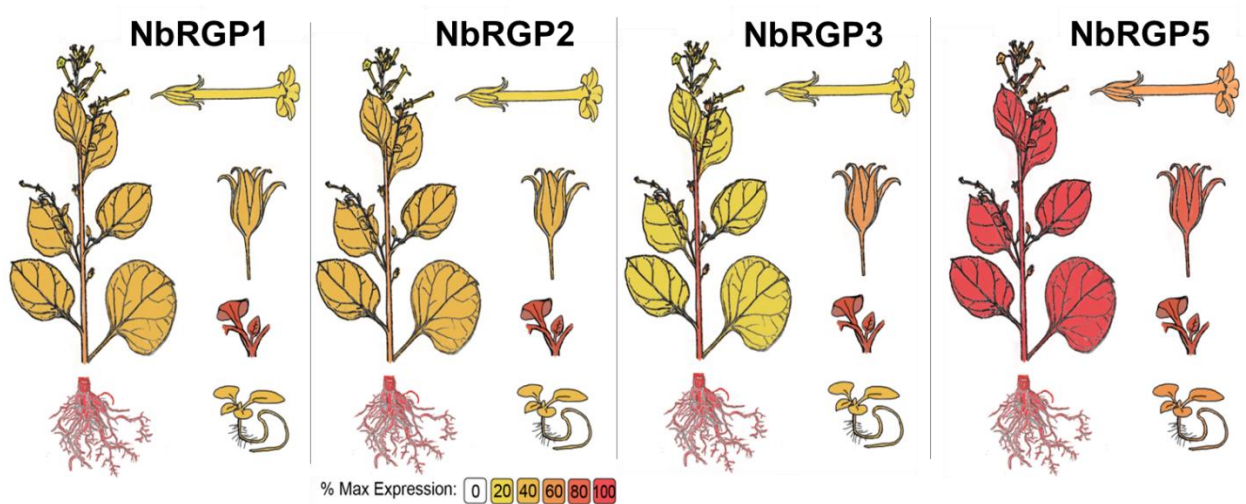

**Figure S6.** *NbRGPs* patterns of expression according to Version 6 Gene expression Atlas <https://sefapps02.qut.edu.au/atlas/tREX6.php>

**Table S1. Oligonucleotides used for cloning**

|     |                                       |
|-----|---------------------------------------|
| F1  | GGTACCATGGCAGCAGCAACGCCATTG           |
| F2  | GGTACCATGGTAGGACGATCAATG              |
| F3  | TCGCGATGGCAACGGCTTC                   |
| F4  | GGGCCCCGTGGTGAGCAAGGGCGAGGAG          |
| F5  | GGTACCATGTCTGCTAGTCAGTG               |
| F6  | GGGCCCCGCCGACAAGCAGAAGAACGG           |
| F7  | GGTACCATGGCTCTAGTTGTAAAGG             |
| F8  | GGTACCGCAGCAGCAACGCCATTG              |
| F9  | GGATCCATAAGAACGGGGCCCAGAGTGAG         |
| F10 | GGATCCATAAGAACGGGGCCCATCGCCTCCTC      |
| F11 | GGTACCATGTCTGCTCTCGATTTCGATTC         |
| F12 | GGATCCATAAGAACGGGGCCCATCGCCTCCTC      |
| F13 | GGTACCATGAAGATCATATCAAGGA             |
| R2  | GTCGACCTACTTTGCCGGGCCATTG             |
| R3  | GTCGACTATTTTGAGCTGCCATTGG             |
| R4  | GGATCCCGACTTTGCAGCCTTTGCAGG           |
| R5  | GTCGACTTAAGTTTGGGTTTGTACAG            |
| R9  | GTCGACTTACTTGTACAGCTCGTCCA            |
| R10 | GTCGACTTAGGCGCCGGTGGAGTG              |
| R11 | GTCGACTTACATGATATAGACGTTGTGGCTGTTGTAG |
| R12 | GTCGACTTAGGACTTGTACAGCTCGTCCATGCC     |
| R13 | GGATCCAAACGAATCCGATTTCGGC             |
| R14 | GGATCCTACAACAGAAGCTAGTTTCCCCG         |
| R15 | GTCGACTTAGGCGCCGGTGGAGTG              |
| R16 | GGATCCAACCTTCTTGAACACAAT              |

**Table S2. Oligonucleotides used for qRT-PCR**

| Gene     | Forward primer         | Reverse primer         |
|----------|------------------------|------------------------|
| 18S rRNA | ACGGCTACCACATCCAAG     | ACTCATTCCAATTACCAGACTC |
| PP2A     | ATTGCTGCCTGTGGTTATTAC  | ATAGACTGAAGTGCTTGATTGG |
| NbRGP1   | GGAATGAACTTGGCCTTTGACC | GCCCACATATCATCGTAACGAC |
| NbRGP2   | GATTCTGCTTGTCTGGTGCTT  | CACGAACGAAATCTGCACCT   |
| NbRGP3   | TCGAGGATTCTGCTTGCCGT   | TCCTTGCCAGTTGGGTCTTT   |
| NbRGP5   | CTGGCGCTGAGGAACACT     | ATGGTAGCAAAGCAGGTCCC   |
| MP       | GGTGTGAGCGTGTGTCTGG    | GCGTCCTGGGTGGTTATAGC   |
| GFP      | GCAGAAGAACGGCATCAAG    | GCTCAGGTAGTGGTTGTCG    |
